# Supplementary material for: Characterization of longitudinal canal tissue in the acorn barnacle Amphibalanus amphitrite
Source: PubMed Central journal article supplement (PMC6287898; doi:10.1371/journal.pone.0208352), 2018-12-10
Supplement: pone.0208352.s001.pdf [file pone.0208352.s001.pdf]

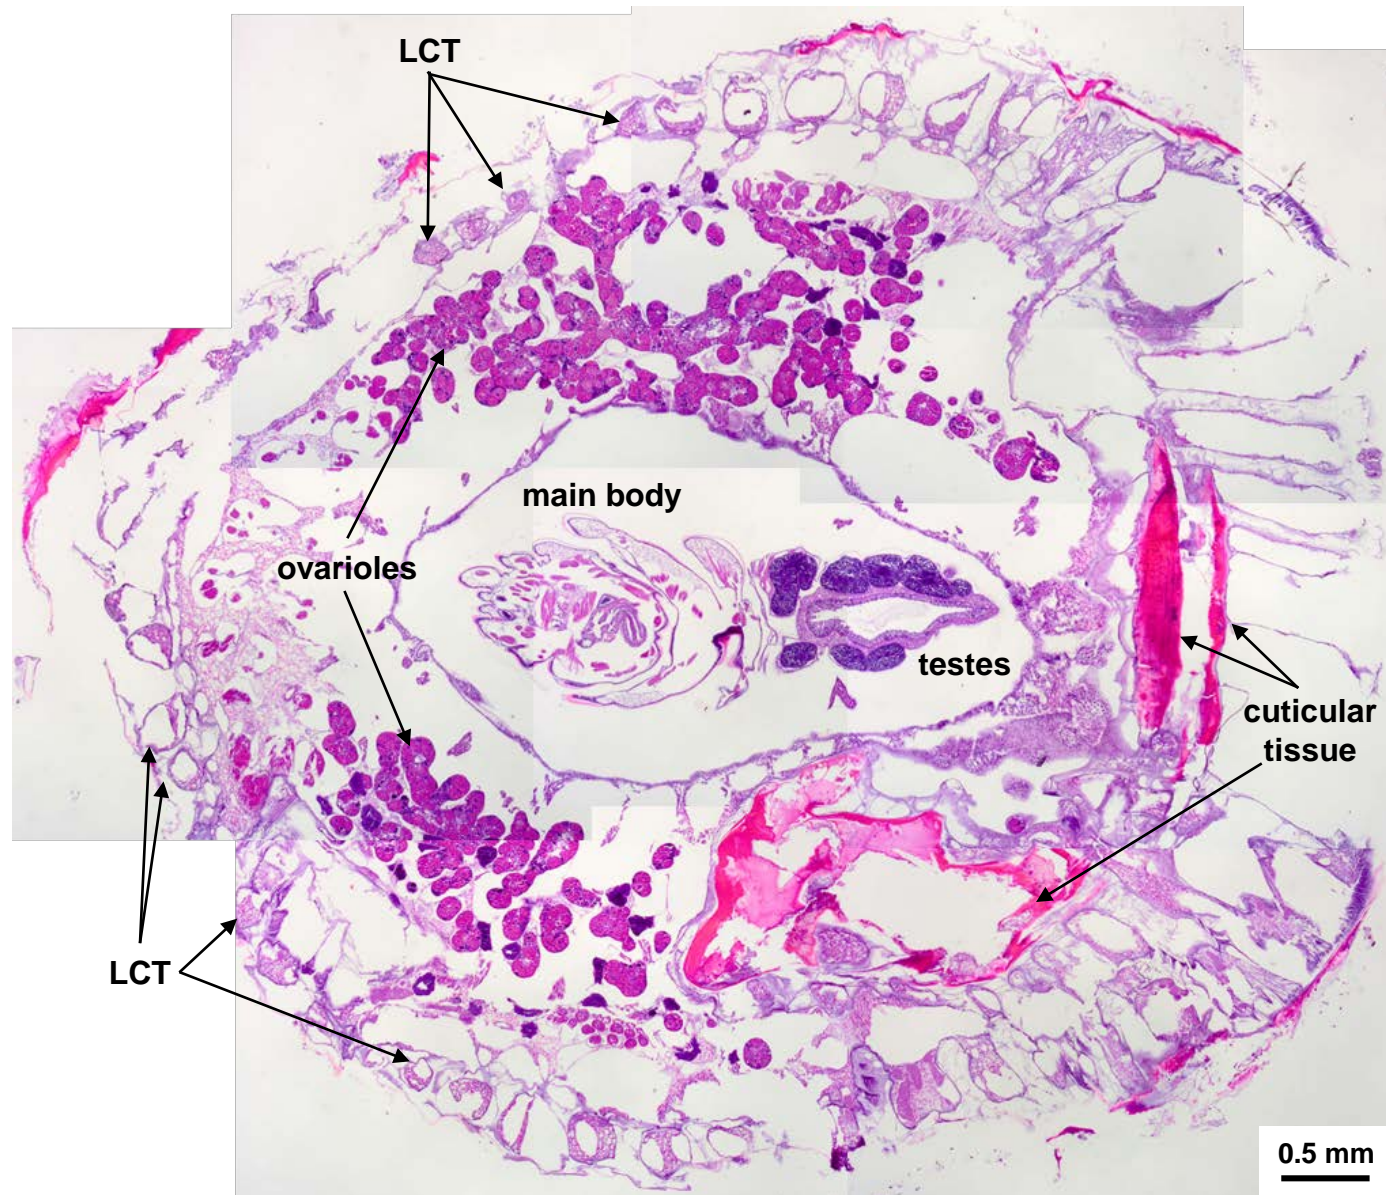

**S1 Fig. Composite images of histological section of *A. amphitrite* along transverse plane.** Section is taken from the lower portion of the barnacle and highlights the presence of various features including: the lower parts of main body and testes, the distribution of ovarioles, LCT, and cuticular tissue.
